# Supplementary material for: Basin-scale community assembly of particle-associated and free-living bacteria in the Pacific Ocean
Source: Research Square preprint supplement (doi:10.21203/rs.3.rs-7838572/v1), 2025-11-17
Supplement: Supplementary file 1 [file 0a79bba57d264d3a66cc5aa6.xlsx]

## Sheet: Table A2
		Table A2 Reads, OTUs and diversity index obtained through 16S rRNA gene 454-pyrosequencing of the Pacific Ocean samples
		Sample name	PA												FL
			Sample code	seq.code	Sequences	Not standardized data					Standardized data*				Sample code	seq.code	Sequences	Not standardized data					Standardized data*
						OTUs	Chao index	Inverse Simpson index	Phylogenetic diversity		OTUs	Chao index	Inverse Simpson index					OTUs	Chao index	Inverse Simpson index	Phylogenetic diversity		OTUs	Chao index	Inverse Simpson index
		N68_0_st15	N68_0_st15a	N74a.27F	439	37	84.5	2.55416	4.6722		20	33.75	2.24615		N68_0_st15f	N74f.27F	1957	62	83.0833	6.46223	7.4787		19	19.5	6.16927
		N64_0_st14	N64_0_st14a	N71a.27F	846	70	103.833	3.75185	8.3305		29	46.5	5.45722		N64_0_st14f	N71f.27F	1526	57	158.5	8.80269	6.7346		19	33	9.36238
		N60_0_st13	N60_0_st13a	N68a.27F	1411	57	82.0909	5.24696	8.7529		18	25	4.83458		N60_0_st13f	N68f.27F	1249	57	111.167	4.25085	7.0761		24	39.6	3.22518
		N55_0_st12	N55_0_st12a	N65a.27F	745	71	120.583	8.02839	9.4561		34	59.5	8.86749		N55_0_st12f	N65f.27F	2729	79	145	4.74545	9.0204		19	37.3333	3.90622
		N55_OMZ1130_st12	N55_OMZ1130_st12a	N67a.27F	410	153	308.037	42.112	18.0253		80	161.059	40.5497		N55_OMZ1130_st12f	N67f.27F	4034	257	404.62	9.95499	27.2705		42	112.2	9.1868
		N50_0_st11	N50_0_st11a	N54a.27F	673	31	91	5.82864	4.95		16	21	5.68524		N50_0_st11f	N54f.27F	3078	87	148.75	6.39206	10.5463		21	36	6.60518
		N50_100_st11	N50_100_st11a	N57a.27F	517	144	255	38.4619	17.6649		71	224.125	34.3989		N50_100_st11f	N57f.27F	5192	253	390.565	6.62383	25.8877		34	76	6.34508
		N50_SCM_st11	N50_SCM_st11a	N58a.27F	1577	36	49	4.501	4.6933		15	20	4.38296		N50_SCM_st11f	N58f.27F	2301	72	110.75	6.49316	8.7178		26	56	6.77323
		N50_200_st11	N50_200_st11a	N59a.27F	390	176	301.634	77.8	21.5259		98	253.312	79.0065		N50_200_st11f	N59f.27F	3525	232	534.885	7.70879	25.1246		33	57.4286	7.31541
		N50_400_st11	N50_400_st11a	N60a.27F	333	143	239.281	80.5802	17.3599		92	242.231	92.7727		N50_400_st11f	N60f.27F	15861	442	705.5	8.20647	46.8668		33	55.6667	8.27432
		N50_1000_st11	N50_1000_st11a	N61a.27F	299	125	268	51.208	15.0311		81	204.75	44.8571		N50_1000_st11f	N61f.27F	2167	184	439.048	10.9899	19.5454		39	69	11.5202
		N50_2000_st11	N50_2000_st11a	N62a.27F	157	87	218.615	68.0333	11.3497		87	218.615	68.0333		N50_2000_st11f	N62f.27F	5538	305	656.154	15.0246	31.7611		43	118.6	13.8217
		N50_B5387_st11	N50_B5387_st11a	N63a.27F	579	149	304.217	25.7274	19.0187		70	164.091	29.9413		N50_B5387_st11f	N63f.27F	3051	205	339.75	11.7019	25.7991		37	52.3	10.5387
		N50_OMZ625_st11	N50_OMZ625_st11a	N64a.27F	451	151	268.037	45.3824	16.9754		84	194	62.4796		N50_OMZ625_st11f	N64f.27F	4040	281	545.625	10.096	28.4101		39	109.2	10.4044
		N45_0_st10	N45_0_st10a	N51a.27F	413	34	49.6	12.9082	4.4425		22	25.75	12.6378		N45_0_st10f	N51f.27F	2819	80	173.5	4.45493	9.3679		17	17.6	4.03626
		N45_OMZ1300_st10	N45_OMZ1300_st10a	N53a.27F	205	109	294.769	100.048	13.8816		94	220	94.2		N45_OMZ1300_st10f	N53f.27F	11165	447	766.924	13.9974	45.0491		39	81	13.3982
		N40_0_st09	N40_0_st09a	N48a.27F	215	32	45	8.61933	4.9544		28	41.2	8.49826		N40_0_st09f	N48f.27F	3163	91	156	2.81284	10.364		23	32	3.00368
		N40_OMZ1000_st09	N40_OMZ1000_st09a	N50a.27F	379	146	303.5	31.7373	17.4329		80	239.6	36.1239		N40_OMZ1000_st09f	N50f.27F	4141	284	553.643	12.8264	28.4475		36	120.333	10.129
		N35_0_st08	N35_0_st08a	N37a.27F	895	97	177.571	9.66154	13.4445		36	53.1	8.31929		N35_0_st08f	N37f.27F	2565	95	136.053	3.26029	11.1397		19	32.75	3.14807
		N35_100_st08	N35_100_st08a	N40a.27F	600	97	184.353	11.2067	13.2343		42	97.2	12.1128		N35_100_st08f	N40f.27F	2505	154	269.625	4.78113	17.4316		34	80.2	4.67048
		N35_SCM66_st08	N35_SCM66_st08a	N41a.27F	729	55	89.3636	2.81214	8.1636		24	59	3.01998		N35_SCM66_st08f	N41f.27F	2728	126	195.391	3.27177	14.8747		22	35.2	3.44279
		N35_200_st08	N35_200_st08a	N42a.27F	1815	281	425.569	11.7383	32.0101		71	144.5	12.5729		N35_200_st08f	N42f.27F	3595	256	443.895	6.7937	26.4801		44	79.1	7.41283
		N35_400_st08	N35_400_st08a	N43a.27F	1934	378	857.717	17.8723	40.1272		75	223.5	24.5904		N35_400_st08f	N43f.27F	4173	363	734.717	9.97381	36.682		47	94.25	11.775
		N35_1000_st08	N35_1000_st08a	N44a.27F	284	127	317.588	75.6798	15.0281		85	244.6	72.8929		N35_1000_st08f	N44f.27F	5183	335	562.638	13.9771	33.2127		46	201	16.2846
		N35_2000_st08	N35_2000_st08a	N45a.27F	181	80	195.909	37.6212	10.9379		74	221	39.6311		N35_2000_st08f	N45f.27F	4453	315	589.773	22.7736	33.457		50	89	21.79
		N35_B5429_st08	N35_B5429_st08a	N46a.27F	371	119	240.714	28.8382	15.2503		69	199.667	27.6433		N35_B5429_st08f	N46f.27F	3560	224	454.1	10.7891	28.7807		49	86.8	14.0921
		N35_OMZ1302_st08	N35_OMZ1302_st08a	N47a.27F	606	205	505.516	49.0541	24.0299		82	241.6	56.6944		N35_OMZ1302_st08f	N47f.27F	5335	370	613.902	19.8731	37.4668		49	96.25	19.9772
		N30_0_st07	N30_0_st07a	N35a.27F	1365	124	238.067	10.0032	15.5869		39	96.75	12.1368		N30_0_st07f	N35f.27F	6844	135	191	3.41603	16.0383		18	40	3.53931
		N25_0_st06	N25_0_st06a	N32a.27F	1553	136	191.038	11.474	16.3776		50	98.3333	14.5267		N25_0_st06f	N32f.27F	8663	136	242.071	2.80748	16.4524		12	26	2.85322
		N25_OMZ840_st06	N25_OMZ840_st06a	N34a.27F	392	137	288.565	35.3813	17.2162		72	207.125	37.2219		N25_OMZ840_st06f	N34f.27F	4027	386	707.692	21.1916	39.1542		52	134.667	21.3717
		N20_0_st05	N20_0_st05a	N24a.27F	542	101	315.5	8.0938	13.6299		43	148.6	6.01178		N20_0_st05f	N24f.27F	5397	144	235.12	2.29172	16.8502		12	22.5	2.23386
		N20_100_st05	N20_100_st05a	N25a.27F	287	97	324.8	11.8719	12.7117		60	128.333	10.8372		N20_100_st05f	N25f.27F	5415	226	472.033	2.39362	23.2163		26	64.25	2.63922
		N20_200_st05	N20_200_st05a	N26a.27F	171	110	359.231	123.178	15.3925		100	296.615	112.349		N20_200_st05f	N26f.27F	3094	397	843.172	13.5217	38.6265		60	201.429	11.3284
		N20_400_st05	N20_400_st05a	N27a.27F	650	250	533.61	81.8808	28.8436		96	247.867	81.64		N20_400_st05f	N27f.27F	3210	395	787.905	22.5553	38.1687		61	241.6	24.3459
		N20_1000_st05	N20_1000_st05a	N28a.27F	308	106	267	18.6354	12.354		64	122.571	20.9692		N20_1000_st05f	N28f.27F	1812	204	402.75	20.5478	21.0617		51	227	18.7822
		N20_2000_st05	N20_2000_st05a	N29a.27F	266	148	368.5	119.475	17.9693		107	323	123.697		N20_2000_st05f	N29f.27F	2742	242	450.417	21.3708	27.3412		48	71	19.0451
		N20_B2857_st05	N20_B2857_st05a	N30a.27F	186	93	181.5	44.5725	12.1166		81	154.667	46.2113		N20_B2857_st05f	N30f.27F	12567	618	1154.28	18.341	65.9345		54	159.6	21.5599
		N20_OMZ706_st05	N20_OMZ706_st05a	N31a.27F	241	105	211.105	52.967	13.6894		76	162.25	52.3333		N20_OMZ706_st05f	N31f.27F	4230	341	548	21.1717	33.8639		54	159.6	24.9918
		Nw20_0_st00	Nw20_0_st00a	S01a.27F	9416	529	1116.59	11.449	59.0823		52	142	10.7233		Nw20_0_st00f	S01f.27F	18649	336	521.353	3.09116	36.312		28	85.75	2.94729
		Nw20_B4146_st00	Nw20_B4146_st00a	S03a.27F	1621	392	668.537	71.3205	44.1517		103	257.167	115.528		Nw20_B4146_st00f	S03f.27F	19764	857	1310.99	21.1384	90.8706		51	83.5	22.1047
		Nw20_OMZ960_st00	Nw20_OMZ960_st00a	S05a.27F	1032	289	479.842	80.9612	33.2536		98	248.938	98.7581		Nw20_OMZ960_st00f	S05f.27F	10073	721	1200.64	24.1089	71.909		69	304.2	25.9449
		N15_0_st04	N15_0_st04a	N21a.27F	1618	178	280	10.8305	21.8729		46	118.5	10.8372		N15_0_st04f	N21f.27F	5051	127	212.55	1.98281	16.2115		17	39	2.0585
		N15_OMZ539_st04	N15_OMZ539_st04a	N23a.27F	165	99	249.938	86.1783	13.338		96	238.375	90.0441		N15_OMZ539_st04f	N23f.27F	4402	349	636.679	21.7593	34.7849		43	60.1	19.3766
		N10_0_st03	N10_0_st03a	N10a.27F	1077	117	194	6.31245	15.4988		32	49.1429	5.5187		N10_0_st03f	N10f.27F	7778	172	279.129	2.05819	20.98		21	51.3333	2.20252
		N10_100_st03	N10_100_st03a	N13a.27F	598	118	182.167	7.59943	15.8733		57	149.625	7.75554		N10_100_st03f	N13f.27F	3130	135	192.033	4.21713	15.9416		27	78	4.74467
		N10_SCM107_st03	N10_SCM107_st03a	N14a.27F	435	93	146.455	7.92037	12.1475		54	137.25	8.19679		N10_SCM107_st03f	N14f.27F	1845	122	249.105	4.18933	13.7956		28	91.3333	4.68836
		N10_200_st03	N10_200_st03a	N15a.27F	351	166	296.286	99.7159	21.1658		98	205.25	93.4809		N10_200_st03f	N15f.27F	5447	485	873.571	17.3937	43.8295		55	160	20.6162
		N10_400_st03	N10_400_st03a	N16a.27F	406	188	339.667	137.254	23.7993		100	205.286	124.959		N10_400_st03f	N16f.27F	4762	410	698.451	21.5469	39.2361		50	125.6	24.7394
		N10_1000_st03	N10_1000_st03a	N17a.27F	728	140	213.312	19.3838	15.9746		49	124.6	22.511		N10_1000_st03f	N17f.27F	6531	410	790.182	17.9903	40.1102		55	181	16.4155
		N10_2000_st03	N10_2000_st03a	N18a.27F	725	184	354.625	29.0224	22.0094		72	178.909	27.4574		N10_2000_st03f	N18f.27F	4411	314	603.091	20.2393	34.3638		49	112	19.7835
		N10_B4401_st03	N10_B4401_st03a	N19a.27F	734	156	294.556	15.1283	19.1493		60	240.6	17.1994		N10_B4401_st03f	N19f.27F	1675	152	318.833	10.6219	19.854		40	90.6	9.38391
		N10_OMZ250_st03	N10_OMZ250_st03a	N20a.27F	365	157	365.143	93.5634	18.8129		94	208.882	89.3869		N10_OMZ250_st03f	N20f.27F	3163	334	557.565	15.8984	30.8606		60	210.5	17.4444
		N05_0_st02	N05_0_st02a	N07a.27F	438	70	127.4	7.05774	8.4904		39	242	7.57797		N05_0_st02f	N07f.27F	3334	99	168	2.96199	12.2739		12	22.5	2.75006
		N05_OMZ625_st02	N05_OMZ625_st02a	N09a.27F	419	173	332.677	85.5186	20.8008		95	195.8	86.8511		N05_OMZ625_st02f	N09f.27F	3935	317	593.25	16.9272	29.3189		48	120.5	16.3936
		N00_0_st01	N00_0_st01a	N04a.27F	673	104	262.882	5.32655	14.9128		34	134	4.98616		N00_0_st01f	N04f.27F	3007	111	204.158	3.9585	13.439		20	46	4.02036
		N00_OMZ394_st01	N00_OMZ394_st01a	N06a.27F	457	212	544.714	112.039	23.1588		96	253.929	97.1905		N00_OMZ394_st01f	N06f.27F	1962	215	530	16.8718	20.559		58	136.111	18.9274
		S00_0_st01	S00_0_st01a	S07a.27F	2587	336	544.448	11.452	36.8554		67	214.333	10.9633		S00_0_st01f	S07f.27F	10448	298	600.429	5.59416	30.4104		28	41	5.91594
		S00_100_st01	S00_100_st01a	S09a.27F	3711	585	816.025	28.7457	60.5548		91	210.167	36.997		S00_100_st01f	S09f.27F	15669	681	995.673	10.6494	63.5542		55	107.5	11.4022
		S00_SCM60_st01	S00_SCM60_st01a	S10a.27F	4825	299	457.769	5.02947	32.443		42	147.6	4.53388		S00_SCM60_st01f	S10f.27F	4850	203	387.69	4.28468	21.9049		29	80	4.59512
		S00_200_st01	S00_200_st01a	S11a.27F	4520	748	1101.76	96.0675	72.6284		109	358	136.067		S00_200_st01f	S11f.27F	9359	758	1258.61	24.1853	66.349		72	225.125	31.3197
		S00_400_st01	S00_400_st01a	S12a.27F	2032	532	840.76	132.632	53.4416		106	272.833	111.327		S00_400_st01f	S12f.27F	4579	436	705.1	26.3472	41.6457		64	166.5	34.2067
		S00_1000_st01	S00_1000_st01a	S13a.27F	2455	522	823.875	115.635	53.654		104	359.462	86.2394		S00_1000_st01f	S13f.27F	17043	825	1274.5	23.1226	76.7881		57	98.3333	24.6895
		S00_2000_st01	S00_2000_st01a	S14a.27F	1462	324	539.893	65.9254	36.5427		84	244.909	57.2243		S00_2000_st01f	S14f.27F	11102	541	1000.01	24.8495	55.6799		58	141.25	27.7059
		S00_B5465_st01	S00_B5465_st01a	S15a.27F	5804	771	1264.01	60.0194	82.4183		83	293.111	46.3864		S00_B5465_st01f	S15f.27F	16307	729	1127.86	16.9396	81.9928		57	86.0625	19.1344
		S00_OMZ450_st01	S00_OMZ450_st01a	S17a.27F	2680	491	694.298	88.8008	49.69		83	223	54.6696		S00_OMZ450_st01f	S17f.27F	11008	696	1157.04	21.4957	61.953		57	115.667	22.9756
		S10_0_st03	S10_0_st03a	S24a.27F	3247	239	368.487	17.1544	29.7579		51	133.667	19.5311		S10_0_st03f	S24f.27F	11162	211	323.588	5.55722	23.5108		26	61	5.54118
		S10_100_st03	S10_100_st03a	S27a.27F	1833	290	469.143	10.724	31.7761		57	109.5	10.658		S10_100_st03f	S27f.27F	8247	357	612	5.22579	34.8793		40	73.3333	5.58923
		S10_SCM117_st03	S10_SCM117_st03a	S28a.27F	2472	396	657.846	15.7295	41.1097		71	169.077	13.8529		S10_SCM117_st03f	S28f.27F	13452	498	840.013	4.60341	44.7456		36	101	3.879
		S10_200_st03	S10_200_st03a	S29a.27F	4319	639	925.613	62.7247	64.1539		83	167.176	39		S10_200_st03f	S29f.27F	11692	750	1165.59	23.4065	69.1615		67	235	21.2974
		S10_400_st03	S10_400_st03a	S30a.27F	11266	1010	1411.75	81.1743	94.1569		103	249.053	92.7727		S10_400_st03f	S30f.27F	4937	486	844.18	25.312	45.017		65	143.111	40.0196
		S10_1000_st03	S10_1000_st03a	S31a.27F	4196	598	924.25	73.9968	62.7924		80	195.909	59.4466		S10_1000_st03f	S31f.27F	5129	438	744.141	23.9858	43.4699		51	133.667	19.5936
		S10_2000_st03	S10_2000_st03a	S32a.27F	1165	305	468.125	68.2741	34.6197		91	202.235	83.3061		S10_2000_st03f	S32f.27F	7195	571	1110.01	29.3534	60.5693		60	98.75	31.0812
		S10_B5100_st03	S10_B5100_st03a	S33a.27F	1176	268	469	62.232	31.2636		87	209.214	67.6575		S10_B5100_st03f	S33f.27F	6894	524	873.719	17.0708	58.1273		57	115.667	18.5545
		S10_OMZ368_st03	S10_OMZ368_st03a	S35a.27F	466	187	401.107	87.5162	22.5322		91	164.333	88.1007		S10_OMZ368_st03f	S35f.27F	11387	775	1518.35	27.2435	67.2447		58	158.429	24.1538
		S15_0_st04	S15_0_st04a	S37a.27F	8199	326	488.255	17.7671	36.2739		51	99	13.5765		S15_0_st04f	S37f.27F	11612	195	274.081	3.88173	22.6015		20	59	3.6588
		S15_OMZ393_st04	S15_OMZ393_st04a	S40a.27F	1233	374	613.4	130.615	41.5338		104	228.25	153.075		S15_OMZ393_st04f	S40f.27F	9974	918	1371.92	30.0324	83.7978		62	191	23.4149
		S20_0_st05	S20_0_st05a	S41a.27F	2364	238	415.6	19.0537	27.4324		54	103.6	21.2236		S20_0_st05f	S41f.27F	9488	192	301.615	2.81302	20.6229		21	56	2.45411
		S20_100_st05	S20_100_st05a	S44a.27F	2300	359	518.203	13.5345	42.2436		76	289.875	14.5439		S20_100_st05f	S44f.27F	15547	359	544.097	2.43269	37.1869		20	59	1.93399
		S20_SCM145_st05	S20_SCM145_st05a	S45a.27F	1793	339	545.684	57.286	37.6895		99	241	81.0993		S20_SCM145_st05f	S45f.27F	4958	379	652.095	6.11729	37.1744		45	138.5	5.79007
		S20_200_st05	S20_200_st05a	S46a.27F	2755	536	861.909	89.0253	54.2692		98	248.938	81.64		S20_200_st05f	S46f.27F	7569	607	879.462	15.0258	56.0375		60	155.667	13.1819
		S20_400_st05	S20_400_st05a	S47a.27F	1522	485	906.446	136.592	52.4533		107	292.882	123.697		S20_400_st05f	S47f.27F	5942	729	1153.85	31.4373	66.6137		77	175.077	35.807
		S20_1000_st05	S20_1000_st05a	S48a.27F	884	307	474.753	101.452	34.3017		106	287.235	130.277		S20_1000_st05f	S48f.27F	7514	639	1147.59	23.103	65.8662		71	165.091	33.187
		S20_2000_st05	S20_2000_st05a	S49a.27F	949	231	359.529	20.8794	27.7399		76	211	22.1447		S20_2000_st05f	S49f.27F	7423	499	1154.67	24.8959	55.8026		53	107.375	23.0621
		S20_B5392_st05	S20_B5392_st05a	S50a.27F	1840	306	471.019	53.3969	35.0975		75	143.333	60.6238		S20_B5392_st05f	S50f.27F	7971	512	888.04	16.0829	56.8573		50	120.857	14.1246
		S20_OMZ2000_st05	S20_OMZ2000_st05a	S51a.27F	1763	373	594	63.8285	41.1551		92	245.214	63.4508		S20_OMZ2000_st05f	S51f.27F	6083	507	1049.75	26.9753	56.4052		60	109.583	30.5387
		S25_0_st06	S25_0_st06a	S52a.27F	4917	320	424.791	21.6912	35.6285		57	168	24.2495		S25_0_st06f	S52f.27F	9702	195	300.333	3.02796	21.4731		22	57	3.63815
		S25_OMZ2450_st06	S25_OMZ2450_st06a	S55a.27F	1825	385	716.667	46.4683	43.7071		94	191.65	75.5926		S25_OMZ2450_st06f	S55f.27F	7315	609	1186.5	29.9682	65.8148		65	135.3	35.4957
		S28_0_stI	S28_0_stIa	S81a.27F	1756	168	373.059	12.3669	21.1371		47	84.8	12.0888		S28_0_stIf	S81f.27F	13077	248	361.364	3.32563	26.4608		17	32	3.43217
		S28_100_stI	S28_100_stIa	S83a.27F	372	106	253.4	13.7819	12.7851		62	278.2	11.4235		S28_100_stIf	S83f.27F	4924	321	576.706	4.87852	31.8165		38	84.4286	3.94905
		S28_1000_stI	S28_1000_stIa	S84a.27F	635	217	390.935	38.32	26.0179		79	177.429	30.7688		S28_1000_stIf	S84f.27F	10433	687	1170.32	23.9857	68.5374		57	105	25.6192
		S28_OMZ2000_stI	S28_OMZ2000_stIa	S85a.27F	360	132	231.4	48.4045	17.0901		85	268	42.0825		S28_OMZ_stIf	S85f.27F	8168	522	1044.93	26.7421	55.7531		54	159.6	23.918
		S30_0_st07	S30_0_st07a	S56a.27F	6961	382	553.284	17.3957	45.2207		55	135.143	16.0078		S30_0_st07f	S56f.27F	11189	247	346.167	3.67509	26.9373		27	57	3.82329
		S30_100_st07	S30_100_st07a	S59a.27F	3099	366	501.705	10.7163	43.1138		78	206.333	15.0258		S30_100_st07f	S59f.27F	13802	412	693.944	3.97999	38.4531		34	172	4.39871
		S30_SCM108_st07	S30_SCM108_st07a	S60a.27F	1989	311	518.643	13.8306	37.8367		65	201.111	10.5569		S30_SCM108_st07f	S60f.27F	5367	306	406.444	6.62227	28.8461		46	92.5	8.22984
		S30_200_st07	S30_200_st07a	S61a.27F	1705	498	912.647	126.263	55.3749		108	384.75	145.786		S30_200_st07f	S61f.27F	4967	612	1080.01	26.7336	58.4101		69	189.111	27.153
		S30_400_st07	S30_400_st07a	S62a.27F	2996	625	915.205	133.479	61.9533		103	266.235	118.893		S30_400_st07f	S62f.27F	14651	1048	1519.61	30.2364	95.0039		76	312.143	34.1114
		S30_1000_st07	S30_1000_st07a	S63a.27F	2433	473	705.179	63.2205	52.169		82	171.438	51.8898		S30_1000_st07f	S63f.27F	11827	835	1563.12	24.8823	82.4025		66	115.4	35.0888
		S30_2000_st07	S30_2000_st07a	S64a.27F	1810	388	598.086	76.7748	43.9356		94	378	69.5795		S30_2000_st07f	S64f.27F	5271	411	690.167	28.8988	44.703		62	120.583	24.8902
		S30_B5472_st07	S30_B5472_st07a	S65a.27F	2188	383	668.098	45.8788	43.513		78	263.625	45.694		S30_B5472_st07f	S65f.27F	6914	455	756.643	15.922	52.8855		51	85.3636	15.2884
		S30_OMZ2500_st07	S30_OMZ2500_st07a	S66a.27F	1841	399	646.513	66.5954	44.5498		95	238	97.968		S30_OMZ2500_st07f	S66f.27F	5909	486	928.75	29.4941	53.9018		66	126	26.4492
		S35_0_st08	S35_0_st08a	S68a.27F	4292	193	252.429	12.4199	24.8141		44	90	12.6117		S35_0_st08f	S68f.27F	7370	154	218.474	4.75788	16.6205		28	281	4.41775
		S35_OMZ2620_st08	S35_OMZ2620_st08a	S71a.27F	1855	370	652.049	55.1149	41.0948		91	199.5	62.4796		S35_OMZ2620_st08f	S71f.27F	6070	481	851.5	29.8927	51.5606		61	103.5	28.2166
		S40_0_st09	S40_0_st09a	S72a.27F	3645	238	382.757	16.1042	28.5643		51	65.6154	19.1944		S40_0_st09f	S72f.27F	2724	121	166.556	4.01959	12.8557		28	43	3.90373
		S40_100_st09	S40_100_st09a	S75a.27F	4073	465	660.763	35.5454	48.8969		80	225.091	25.673		S40_100_st09f	S75f.27F	11654	408	636.25	7.78517	39.3718		45	95.75	7.09091
		S40_1000_st09	S40_1000_st09a	S76a.27F	3214	562	896.125	97.3434	57.8868		101	260.75	117.75		S40_1000_st09f	S76f.27F	8438	577	852.984	21.9968	55.6491		51	170	17.1513
		S40_3000_st09	S40_3000_st09a	S77a.27F	1850	401	663.708	59.7493	45.5544		84	198	49.9837		S40_3000_st09f	S77f.27F	15527	668	960.863	26.7565	71.8861		59	158.167	35.5988
		S40_B4665_st09	S40_B4665_st09a	S78a.27F	6598	776	1267.98	49.6752	80.4552		83	197	42.5208		S40_B4665_st09f	S78f.27F	16486	675	1060.58	23.3085	74.9278		51	81	25.673
		S40_OMZ2000_st09	S40_OMZ2000_st09a	S79a.27F	1809	397	679.652	73.687	43.1179		90	234	57.7642		S40_OMZ_st09f	S79f.27F	7684	477	817.5	28.1621	50.0241		56	204.75	24.3459
		N1_0	N1a_0	NSE_a3.27F	8390	811	1348.35	18.8103	88.8814		71	224.111	17.6965		N1f_0	NSE_f3.27F	13779	401	609.448	2.93013	40.1716		29	106	3.0237
		N2_0	N2a_0	NSE_a15.27F	8980	982	1671.06	25.2637	105.797		78	432	25.354		N2f_0	NSE_f15.27F	12469	484	728.083	3.77542	45.7204		37	138.5	3.41209
		N2_100	N2a_100	NSE_a17.27F	8570	1028	1547.6	96.4759	99.7668		113	421.077	151.185		N2f_100	NSE_f17.27F	14018	1002	1646.53	33.4023	94.8556		70	182.8	26.0553
		N2_1000	N2a_1000	NSE_a21.27F	9644	727	1421.4	22.8047	79.6819		66	127.5	19.4381		N2f_1000	NSE_f21.27F	11317	702	1170.09	24.0361	78.2343		54	106.8	19.5311
		N2_B-50_5273	N2a_B-50_5273	NSE_a23.27F	10412	1022	1953.4	16.0479	105.24		69	189.545	12.1972		N2f_B-50_5273	NSE_f23.27F	17172	494	845.775	2.92117	48.6085		36	78.8571	2.96585
		N3_0	N3a_0	NSE_a26.27F	15804	613	996.917	10.6263	62.4227		53	91.75	9.50039		N3f_0	NSE_f26.27F	16554	355	482.553	4.56522	35.819		39	106.667	5.06871
		S1_0	S1a_0	NSE_a41.27F	13887	358	544.333	17.7143	42.721		42	72	15.6199		S1f_0	NSE_f41.27F	16739	259	358.6	6.00599	29.3284		34	184	5.81482
		S2_0	S2a_0	NSE_a52.27F	11160	542	818.359	16.8217	59.3149		57	144.875	18.869		S2f_0	NSE_f52.27F	9947	288	403.735	7.94517	30.8895		35	81.2	7.1993
		S2_100	S2a_100	NSE_a54.27F	13124	739	1262.8	11.8905	83.3912		56	89.2143	17.4693		S2f_100	NSE_f54.27F	8485	336	472.685	4.98593	30.5523		36	101	4.15823
		S2_1000	S2a_1000	NSE_a58.27F	13053	1264	1823.19	117.833	121.112		106	272.833	130.277		S2f_1000	NSE_f58.27F	10017	903	1538.96	27.1877	87.1517		61	172.429	23.1932
		S2_B-50_3302	S2a_B-50_3302	NSE_a60.27F	9870	1020	1455.5	83.4396	101.009		95	284.833	90.7111		S2f_B-50_3302	NSE_f60.27F	8921	608	1294.83	34.0401	66.2742		66	120.077	34.4958
		S3_0	S3a_0	NSE_a63.27F	10675	508	940.714	9.15875	59.6066		48	102.375	8.11531		S3f_0	NSE_f63.27F	13852	273	487	6.62249	30.1714		38	107	8.54571
		E1_0	E1a_0	NSE_a74.27F	8640	477	835.538	21.2313	57.1323		55	103	21.2604		E1f_0	NSE_f74.27F	12863	271	396.824	6.98136	29.9176		38	62.4286	9.63493
		E2_0	E2a_0	NSE_a86.27F	3736	314	478.455	24.6483	36.8715		50	93.875	22.511		E2f_0	NSE_f86.27F	11903	221	322.25	6.14385	24.6267		33	109.5	6.76949
		E2_100	E2a_100	NSE_a88.27F	7266	1068	1887.64	115.972	102.191		106	252.3	124.959		E2f_100	NSE_f88.27F	11324	862	1366.44	31.4755	72.248		69	194.333	26.6217
		E2_1000	E2a_1000	NSE_a92.27F	12641	1234	1928.09	152.369	116.258		116	351.588	197.516		E2f_1000	NSE_f92.27F	13980	857	1435.59	25.9108	75.7221		70	229.375	27.0929
		E2_B-50_4013	E2a_B-50_4013	NSE_a94.27F	9397	1111	1892.06	75.7894	110.777		94	289.5	48.5952		E2f_B-50_4013	NSE_f94.27F	12759	739	1436.03	33.8477	80.6163		55	78.2143	31.9739
		E3_0	E3a_0	NSE_a99.27F	5344	414	658.944	14.8889	48.5885		68	138.714	11.2762		E3f_0	NSE_f99.27F	16137	268	359	5.18119	29.0379		30	57.2	5.03122
		*Standardized α-diversity analyses in this study were performed after random subsampling of 157 sequences to reduce sequencing bias, in which N50_2000_st11 represents the lowest number of reads obtained across all samples.
					1368106
