# Supplementary material for: Basin-scale community assembly of particle-associated and free-living bacteria in the Pacific Ocean
Source: Research Square preprint supplement (doi:10.21203/rs.3.rs-7838572/v1), 2025-11-17
Supplement: Supplementary file 2 [file 0ac70f99bbdaa5aa007d56b8.docx]

**Supplementary Methods**

**DNA Extraction**

Total DNA extraction from two filters (0.22 and 3.0 µm) of each sampling site was performed using the ChargeSwitch Forensic DNA Puriﬁcation Kit according to the manufacturer’s instructions with slight modifications, as described previously (Cui et al. 2015). Briefly, the membranes were cut into pieces with sterile surgical blades and crushed by bead beating before starting the procedure of the manufacturer’s instructions. For each sample, the initial steps of bead beating until elution were repeated twice to increase the yield. The DNA concentration was determined using the Quant-iT PicoGreen Double-Stranded DNA Kit (Invitrogen).

**PCR amplification of 16S rRNA gene**

To reveal the community structures of each sample, the 16S rRNA gene was amplified with 27F (5′-tagCCATCTCATCCCTGCGTGTCTCCGACTCAG-barcodeXXXX-AGAGTTTGATCMTGGCTCAG-3′) and 519R (5′-GWATTACCGCGGCKGCTG-3′) primer sets targeting the V1-V3 hypervariable region (V1V3; Frank et al. 2008, Lane et al. 1985). As for the KH-13-7 and KH-14-3 samples, a 10 μL tripret reaction mixture contained 5 μM forward primer (10% final concentration), 5 μM reverse primer (2%), 10× Ex Taq buffer (10%), deoxynucleotide triphosphate (dNTP) mixture (10%), Taq DNA polymerase (0.4%; Takara, Japan) and 1 μL template DNA. As for the KH-11-10 and KH-12-1 samples, a 10 μL tripret reaction mixture contained 5 μM forward primer (2%), 5 μM reverse primer (2%), 10× Ex Taq buffer (10%), dNTP mixture (10%), bovine serum albumin (20 mg/mL; 2%), Taq DNA polymerase (0.4%) and 1 μL template DNA. The PCR products were purified by AMPure XP (Beckman Coulter, USA).

**Sequencing**

The PCR amplicons were sequenced using the 454 Life Science FLX+ System at Hokkaido System Science Co., Ltd. The obtained sequences were quality-checked, trimmed and binned using the Mothur software package version 1.36.1 (Schloss et al. 2009) following the 454 standard operating procedure. In brief, the PyroNoise algorithm was implemented to remove sequences arising from pyrosequencing errors and then the tags and primers were removed from the obtained reads (Quince et al. 2009). Treated sequences were denoised <25% of the average quality score and checked for chimeras using the chimera.uchime in Mothur (Edgar et al. 2011). The high-quality sequences were clustered into OTUs using the furthest neighbour clustering algorithm based on 97% similarity (Schloss and Westcott 2011). Each OTU was identified based on the SILVA database (release 119) from each representative sequence. Recently, the 454 pyrosequencing platform has already been replaced by other sequencers that could produce greater sequencing depths per sample. However, results from 454 pyrosequencing are still valid to date. Some studies have shown that results from 454 pyrosequencing were comparable to those from the Illumina MiSeq platform (Tremblay et al. 2015, Allali et al. 2017, Castelino et al. 2017), which lead to similar biological conclusions.

Bacterial 16S rRNA gene sequence data are deposited in the NCBI BioProject accession no. PRJNA1258219.

**Ecological Theory to Fit the Vertical Patterns of Bacterial Diversity**

The possible ecological theories were listed to consider which theory can explain the vertical patterns of diversity. Among the 10 hypotheses, the ‘area effect’ was most likely to explain the pattern of FL bacterial diversity along the depth. The nonstandardised inverse Simpson index and the phylogenetic diversity (PD) were plotted as a function of the area size. The ‘area size’ was expressed as the thickness (depth) of the water body sharing the same density category. The density category was defined as following seven categories: sigma-t 21-22, sigma-t 22-23, sigma-t 23-24, sigma-t 24-25, sigma-t 25-26, sigma-t 26-27 and sigma-t 27-28. The relationships between the diversity and the area size were tested by model fitting using the equation: S = cAz, where S is the diversity index, c is constant, A is the area size and z is the slope of the regression line.

The microbial PD was calculated using the following equation:

where e is the edge of the tree, and λ is the edge weight function of the phylogenetic tree (Faith 1992, Steel 2005).

**Statistical Analysis**

All calculations were done by R software version 3.6.3 (R Development Core Team 2020) with ‘vegan’ (Oksanen et al. 2007), ‘MASS’ (Venables and Ripley 2002) and ‘mgcv’ (Wood 2017) packages for the analysis. Data of the α-diversity based on the Chao1 index and the inverse Simpson index was derived from Mothur software package version 1.36.1 (Schloss et al. 2009).

The nonstandardised values of the inverse Simpson index of the 0 m samples were fit by the GAM as smoothing functions of a large-scale gradient of environmental parameters, such as latitude, temperature, salinity, Chl *a*, nitrate plus nitrite and phosphate. Nitrate plus nitrite and phosphate concentration data below the detection limit (<3 nM) were assigned to 3 nM. Nitrate plus nitrite and phosphate concentrations were log10-transformed for GAM. The collinearity of these parameters had acceptable qualities (VIF score < 10). In addition, the explanatory variables and final model descriptions were selected based on the AIC values. GAM used the Gaussian distribution and identity link function, setting the K value of these parameters as 6. The inverse Simpson index plotted along the depth was fit by locally weighted regressions (LOWESS smoothing) to express the vertical patterns.

To represent differences in the community structure among samples, NMDS was carried out based on the Bray-Curtis distance matrix of dissimilarity between the samples. In addition, to test the statistical significance of the categories (PA/FL, depth and region), *envfit* for correlation between ordination and categories and nonparametric multivariate analysis of variance [permutational analysis of variance (PERMANOVA), *adonis*] for the significance of each category were conducted (permutation = 999).

The correlation between the community structure variability of each depth (0, 100, 1000 and B-50 m) and environmental parameters was tested by dbRDA. Temperature, salinity, nitrate plus nitrite concentration, phosphate concentration (only for 0 and 1000 m) and Chl *a* concentration (only for 0 and 100 m) were used as environmental parameters. The environmental parameters were standardised and selected by AIC to find strongly related parameters in the dbRDA. The collinearity of these parameters was checked below the acceptable levels (VIF score < 10) before AIC selection. Additionally, to test the significance of the selected parameters in the dbRDA, PERMANOVA (n = 1000) was performed on dbRDA models. Also, the relationship between the dissimilarity of bacterial community structures and the distance of locations was evaluated at 0, 100, 1000 and B-50 m, respectively.

The significance of environmental and/or spatial factors in determining the variability of community structure was evaluated by the partial Mantel test for the relationship between the community dissimilarity with environmental and/or spatial factor(s) and the VP (*varpart*; Legendre 2008) to estimate the amount of variation explained by environmental and spatial factors. To avoid redundancy and multicollinearity, AIC selected dbRDA models were used in VP as environmental variables.

**References**

Allali I, Arnold JW, Roach J, Cadenas MB, Butz N, Hassan HM, Koci M, Ballou A, Mendoza M, Ali R, et al. A comparison of sequencing platforms and bioinformatics pipelines for compositional analysis of the gut microbiome. BMC Microbiol. 2017;17(1):194

Castelino M, Eyre S, Moat J, et al. (2017) Optimisation of methods for bacterial skin microbiome investigation: primer selection and comparison of the 454 versus MiSeq platform. BMC Microbiol.17(1):23

Cui Y, Suzuki S, Omori Y, Wong SK, Ijichi M, Kaneko R, Kameyama S, Tanimoto H, Hamasaki K (2015) Abundance and Distribution of Dimethylsulfoniopropionate Degradation Genes and the Corresponding Bacterial Community Structure at Dimethyl Sulfide Hot Spots in the Tropical and Subtropical Pacific Ocean. Appl Environ Microbiol 81:4184–4194

Edgar RC, Haas BJ, Clemente JC, Quince C, Knight R (2011) UCHIME improves sensitivity and speed of chimera detection. Bioinformatics 27:2194-2200

Faith DP (1992) Conservation evaluation and phylogenetic diversity. Biol Conserv 61:1–105

Frank JA, Reich CI, Sharma S, Weisbaum JS, Wilson BA, et al. (2008) Critical evaluation of two primers commonly used for amplification of bacterial 16S rRNA genes. Appl Environ Microbiol 74: 2461–2470

Lane DJ, Pace B, Olsen GJ, Stahl DA, Sogin ML, et al. (1985) Rapid determination of 16S ribosomal RNA sequences for phylogenetic analyses. Proc Natl Acad Sci U S A 82: 6955–6959.

Legendre P (2008) Studying beta diversity: ecological variation partitioning by multiple regression and canonical analysis. J Plant Ecol.; 1(1):3–8.

Oksanen J, Kindt R, Legendre P, O’Hara RB (2007) vegan: community ecology package version 1.8–5.

Quince C, Lanzen A, Curtis T, Davenport R, Hall N, Head I, Read L, Sloan W (2009) Accurate determination of microbial diversity from 454 pyrosequencing data. Nat Methods, 6:639-641.

R Development Core Team (2020) R: A language and environment for statistical computing. In R Foundation for Statistical Computing [ed.]. https://www.R-projct.org/.

Schloss PD, Westcott SL, Ryabin T, Hall JR, Hartmann M, Hollister EB, Lesniewski RA, Oakley BB, Parks DH, Robinson CJ, Sahl JW, Stres B, Thallinger GG, Van Horn DJ, Weber CF (2009) Introducing mothur: open source, platform-independent, community-supported software for describing and comparing microbial communities. Appl Environ Microbiol 75:7537–7541.

Schloss PD, Westcott SL (2011). Assessing and improving methods used in operational taxonomic unit-based approaches for 16S rRNA gene sequence analysis. Appl Environ Microbiol.;77:3219–26.

Steel M, Mimoto A, Mooers AO (2007) Hedging our bets: the expected contribution of species to future phylogenetic diversity. Evol Bioinform Online 3:237–244

Tremblay J, Singh K, Fern A, Kirton ES, He S, Woyke, T., & Tringe, S. G. (2015). Primer and platform effects on 16S rRNA tag sequencing. Frontiers in microbiology, 6, 771.

Venables WN, Ripley BD (2002) Modern Applied Statistics with S-Plus, (4th ed.). New York, NY: Springer

Wood, SN (2017) Package ‘mgcv’. <http://cran.r-project.org/web/packages/mgcv/mgcv.pdf>
