# Supplementary material for: Basin-scale community assembly of particle-associated and free-living bacteria in the Pacific Ocean
Source: Research Square preprint supplement (doi:10.21203/rs.3.rs-7838572/v1), 2025-11-17
Supplement: Supplementary file 3 [file 11f442476e74ee5c5c5345ec.xlsx]

## Sheet: Table A1
	Table A1 Environmental parameters
	Sample name	Cruise	Station	Latitude	Longitude	Depth [m]	Density [σ-t]	Temperature [deg]	Salinity [psu]	Chl. a [µg/L]	NO3+NO2 [nM]*	PO4 [nM]*
	N68_0_st15	KH14-3	Stn. 15	68°00'N	168°00'W	0	25.6967	3.9193	32.3583	0.133242	339.377	527.754		1
	N64_0_st14	KH14-3	Stn. 14	64°15'N	168°00'W	0	24.0938	9.1125	31.1578	0.634916	5	130.505		2
	N60_0_st13	KH14-3	Stn. 13	60°00'N	170°39'W	0	23.4134	9.877	30.4399	0.499025	7	267.422		3
	N55_0_st12	KH14-3	Stn. 12	55°00'N	170°00'W	0	24.8049	11.6397	32.6164	1.07606	699.659	429.971		4
	N55_OMZ1130_st12	KH14-3	Stn. 12	55°00'N	170°00'W	1130	27.4347	2.6576	34.3977	NA	45482	3203.79		5
	N50_0_st11	KH14-3	Stn. 11	50°00'N	170°00'W	0	24.7546	11.604	32.5432	1.0484	7514.84	799.312		6
	N50_100_st11	KH14-3	Stn. 11	50°00'N	170°00'W	100	26.4525	4.6617	33.4103	0.0463609	30375.7	2139.07		7
	N50_SCM_st11	KH14-3	Stn. 11	50°00'N	170°00'W	19	24.9148	10.6021	32.5211	0.917026	7239.3	818.795		8
	N50_200_st11	KH14-3	Stn. 11	50°00'N	170°00'W	200	26.9069	3.9863	33.893	0.010027	42737.3	2841.73		9
	N50_400_st11	KH14-3	Stn. 11	50°00'N	170°00'W	400	27.1004	3.8551	34.1195	NA	44951.4	3021.89		10
	N50_1000_st11	KH14-3	Stn. 11	50°00'N	170°00'W	1000	27.4347	2.7268	34.4052	NA	45435	3147.29		11
	N50_2000_st11	KH14-3	Stn. 11	50°00'N	170°00'W	2000	27.6576	1.8616	34.5945	NA	42814.9	2893.3		12
	N50_B5387_st11	KH14-3	Stn. 11	50°00'N	170°00'W	5387	27.7536	1.5648	34.6862	NA	36717.9	2405.96		13
	N50_OMZ625_st11	KH14-3	Stn. 11	50°00'N	170°00'W	625	27.2517	3.3593	34.2484	NA	45187.1	3102.98		14
	N45_0_st10	KH14-3	Stn. 10	45°00'N	170°00'W	0	24.9522	12.4666	33.0059	0.260775	9875.96	896.129		15
	N45_OMZ1300_st10	KH14-3	Stn. 10	45°00'N	170°00'W	1300	27.4963	2.5347	34.4615	NA	NA	2158.89		16
	N40_0_st09	KH14-3	Stn. 9	40°00'N	170°00'W	0	24.4037	17.5104	33.7111	0.285301	472.525	165.342		17
	N40_OMZ1000_st09	KH14-3	Stn. 9	40°00'N	170°00'W	1000	27.3129	3.3212	34.3206	NA	28961.6	2036.06		18
	N35_0_st08	KH14-3	Stn. 8	35°00'N	170°00'W	0	23.448	23.476	34.5413	0.0701761	9	15		19
	N35_100_st08	KH14-3	Stn. 8	35°00'N	170°00'W	100	25.6219	15.0408	34.5575	0.257272	5922.73	414.155		20
	N35_SCM66_st08	KH14-3	Stn. 8	35°00'N	170°00'W	66	25.5103	15.5626	34.563	0.652202	2009.77	205.875		21
	N35_200_st08	KH14-3	Stn. 8	35°00'N	170°00'W	200	25.8467	13.6558	34.4669	0.00953413	6392.86	447.594		22
	N35_400_st08	KH14-3	Stn. 8	35°00'N	170°00'W	400	26.1748	10.9971	34.2279	NA	12175.2	836.747		23
	N35_1000_st08	KH14-3	Stn. 8	35°00'N	170°00'W	1000	27.2266	3.6651	34.2542	NA	44411.7	3072.23		24
	N35_2000_st08	KH14-3	Stn. 8	35°00'N	170°00'W	2000	27.6446	2.0593	34.5977	NA	42841.5	2944.69		25
	N35_B5429_st08	KH14-3	Stn. 8	35°00'N	170°00'W	5429	27.7526	1.5843	34.6868	NA	37031.4	2497.64		26
	N35_OMZ1302_st08	KH14-3	Stn. 8	35°00'N	170°00'W	1302	27.433	2.9314	34.4258	NA	46100.7	3152.81		27
	N30_0_st07	KH14-3	Stn. 7	30°00'N	170°00'W	0	23.1988	25.9094	35.1819	0.0584018	29	20		28
	N25_0_st06	KH14-3	Stn. 6	24°00'N	170°00'W	0	23.3356	26.4193	35.575	0.0587076	6	35		29
	N25_OMZ840_st06	KH14-3	Stn. 6	24°00'N	170°00'W	840	27.2185	4.4331	34.344	NA	NA	2899.54		30
	N20_0_st05	KH14-3	Stn. 5	20°00'N	170°00'W	0	22.688	27.467	35.1597	0.0578103	N.D.	109.087		31
	N20_100_st05	KH14-3	Stn. 5	20°00'N	170°00'W	100	24.1995	23.2026	35.428	0.228458	N.D.	69		32
	N20_200_st05	KH14-3	Stn. 5	20°00'N	170°00'W	200	25.0732	18.5101	34.906	0.0273913	4636.31	349.983		33
	N20_400_st05	KH14-3	Stn. 5	20°00'N	170°00'W	400	26.4821	8.5947	34.1066	NA	22993.5	1542.47		34
	N20_1000_st05	KH14-3	Stn. 5	20°00'N	170°00'W	1000	27.3833	4.1214	34.5095	NA	42670.9	2939.23		35
	N20_2000_st05	KH14-3	Stn. 5	20°00'N	170°00'W	2000	27.6582	2.0917	34.6178	NA	40904.1	2822.8		36
	N20_B2857_st05	KH14-3	Stn. 5	20°00'N	170°00'W	2857	27.7353	1.5578	34.6628	NA	38877	2593.91		37
	N20_OMZ706_st05	KH14-3	Stn. 5	20°00'N	170°00'W	706	27.1735	5.1036	34.3823	NA	41750.4	2908.86		38
	Nw20_0_st00	KH13-7	Stn. 0	20°00'N	160°00'E	0	22.5041	27.7245	35.0262	0.0902308	23	16		39
	Nw20_B4146_st00	KH13-7	Stn. 0	20°00'N	160°00'E	4146	27.7636	1.4492	34.6881	NA	36434.8	2513.83		40
	Nw20_OMZ960_st00	KH13-7	Stn. 0	20°00'N	160°00'E	960	27.3467	4.1119	34.4622	NA	NA	NA		41
	N15_0_st04	KH14-3	Stn. 4	15°00'N	170°00'W	0	22.5434	27.512	34.9869	0.0557683	N.D.	102.41		42
	N15_OMZ539_st04	KH14-3	Stn. 4	15°00'N	170°00'W	539	26.9976	6.6437	34.4038	NA	39910.8	2851.41		43
	N10_0_st03	KH14-3	Stn. 3	10°00'N	170°00'W	0	22.0837	28.4495	34.7827	0.078481	21.1406	168.037		44
	N10_100_st03	KH14-3	Stn. 3	10°00'N	170°00'W	100	23.9697	22.0413	34.6889	0.304838	164.291	212.438		45
	N10_SCM107_st03	KH14-3	Stn. 3	10°00'N	170°00'W	107	24.7101	19.096	34.6251	0.309743	2686.26	403.189		46
	N10_200_st03	KH14-3	Stn. 3	10°00'N	170°00'W	200	26.4881	11.2866	34.698	0.0100693	34820.7	2532.79		47
	N10_400_st03	KH14-3	Stn. 3	10°00'N	170°00'W	400	26.7689	9.4554	34.6486	NA	37757.8	2708.87		48
	N10_1000_st03	KH14-3	Stn. 3	10°00'N	170°00'W	1000	27.3521	4.6914	34.5481	NA	43223.5	3059.14		49
	N10_2000_st03	KH14-3	Stn. 3	10°00'N	170°00'W	2000	27.6625	2.2049	34.6347	NA	40875.3	2811.95		50
	N10_B4401_st03	KH14-3	Stn. 3	10°00'N	170°00'W	4401	27.7763	1.3378	34.694	NA	35808.9	2401.71		51
	N10_OMZ250_st03	KH14-3	Stn. 3	10°00'N	170°00'W	250	26.5897	10.7473	34.7032	0.00852016	35222.9	2523.02		52
	N05_0_st02	KH14-3	Stn. 2	5°00'N	170°00'W	0	21.3819	29.3775	34.2597	0.0639255	N.D.	96.6316		53
	N05_OMZ625_st02	KH14-3	Stn. 2	5°00'N	170°00'W	625	27.0895	6.9325	34.5701	NA	43228.1	3109.3		54
	N00_0_st01	KH14-3	Stn. 1	00°15'N	170°00'W	0	22.5668	28.3751	35.3928	0.332166	4305.94	527.943		55
	N00_OMZ394_st01	KH14-3	Stn. 1	00°15'N	170°00'W	394	26.7525	9.8776	34.7179	NA	35622.1	2897.12		56
	S00_0_st01	KH13-7	Stn. 1	00°00'S	170°00'W	0	22.9695	27.3382	35.4784	0.340258	5933.36	526.588		57
	S00_100_st01	KH13-7	Stn. 1	00°00'S	170°00'W	100	23.1358	26.6667	35.414	0.207808	9145.26	733.506		58
	S00_SCM60_st01	KH13-7	Stn. 1	00°00'S	170°00'W	60	23.0242	27.1277	35.461	0.39 (45m)	6671.61	622.546		59
	S00_200_st01	KH13-7	Stn. 1	00°00'S	170°00'W	200	25.8337	16.1969	35.1707	0.0117964	14546.7	1085.31		60
	S00_400_st01	KH13-7	Stn. 1	00°00'S	170°00'W	400	26.7375	10.0153	34.7288	NA	31036.1	2127.91		61
	S00_1000_st01	KH13-7	Stn. 1	00°00'S	170°00'W	1000	27.3491	4.7303	34.5498	NA	41048	2879.31		62
	S00_2000_st01	KH13-7	Stn. 1	00°00'S	170°00'W	2000	27.6575	2.2923	34.6374	NA	40419.5	2814.2		63
	S00_B5465_st01	KH13-7	Stn. 1	00°00'S	170°00'W	5465	27.7861	1.3148	34.7042	NA	34788.5	2363.21		64
	S00_OMZ450_st01	KH13-7	Stn. 1	00°00'S	170°00'W	450	26.8765	8.8466	34.6601	NA	NA	NA		65
	S10_0_st03	KH13-7	Stn. 3	10°00'S	170°00'W	0	21.7274	30.2341	35.1086	0.0574172	26	167.625		66
	S10_100_st03	KH13-7	Stn. 3	10°00'S	170°00'W	100	23.507	26.7807	35.9544	0.292342	3386.08	459.226		67
	S10_SCM117_st03	KH13-7	Stn. 3	10°00'S	170°00'W	117	24.1256	25.2551	36.1409	0.28 (105m)	4772.6	521.745		68
	S10_200_st03	KH13-7	Stn. 3	10°00'S	170°00'W	200	25.2073	20.6841	35.824	0.0373452	8734.57	805.384		69
	S10_400_st03	KH13-7	Stn. 3	10°00'S	170°00'W	400	26.7796	9.5042	34.6725	NA	30844.1	2101.51		70
	S10_1000_st03	KH13-7	Stn. 3	10°00'S	170°00'W	1000	27.3661	4.453	34.5325	NA	40559.4	2812.55		71
	S10_2000_st03	KH13-7	Stn. 3	10°00'S	170°00'W	2000	27.6655	2.1901	34.637	NA	39071.7	2701.28		72
	S10_B5100_st03	KH13-7	Stn. 3	10°00'S	170°00'W	5100	27.8046	1.1007	34.7088	NA	34262.4	2294.04		73
	S10_OMZ368_st03	KH13-7	Stn. 3	10°00'S	170°00'W	368	26.6536	10.4513	34.7179	NA	NA	NA		74
	S15_0_st04	KH13-7	Stn. 4	15°00'S	170°00'W	0	22.1738	29.1098	35.1951	0.0683228	22	194.731		75
	S15_OMZ393_st04	KH13-7	Stn. 4	15°00'S	170°00'W	393	26.4461	11.6317	34.7263	NA	NA	NA		76
	S20_0_st05	KH13-7	Stn. 5	20°00'S	170°00'W	0	22.8258	27.7277	35.4551	0.073203	16	110.796		77
	S20_100_st05	KH13-7	Stn. 5	20°00'S	170°00'W	100	23.8985	24.6158	35.583	0.26649	4	67		78
	S20_SCM145_st05	KH13-7	Stn. 5	20°00'S	170°00'W	145	24.3118	23.2543	35.5958	0.24714	258.47	106.539		79
	S20_200_st05	KH13-7	Stn. 5	20°00'S	170°00'W	200	24.747	21.8176	35.629	0.083407	1792.74	212.131		80
	S20_400_st05	KH13-7	Stn. 5	20°00'S	170°00'W	400	26.2459	14.5216	35.22	NA	9811.04	708.029		81
	S20_1000_st05	KH13-7	Stn. 5	20°00'S	170°00'W	1000	27.3285	3.959	34.4194	NA	35187.9	2367.73		82
	S20_2000_st05	KH13-7	Stn. 5	20°00'S	170°00'W	2000	27.6591	2.2065	34.6306	NA	37610.5	2604		83
	S20_B5392_st05	KH13-7	Stn. 5	20°00'S	170°00'W	5392	27.8046	1.0966	34.7085	NA	33804.4	2300.76		84
	S20_OMZ2000_st05	KH13-7	Stn. 5	20°00'S	170°00'W	2000	27.6591	2.2065	34.6306	NA	NA	NA		85
	S25_0_st06	KH13-7	Stn. 6	25°00'S	170°00'W	0	23.3642	26.2312	35.5345	0.065513	4	30		86
	S25_OMZ2450_st06	KH13-7	Stn. 6	25°00'S	170°00'W	2450	27.6855	2.0118	34.644	NA	NA	NA		87
	S28_0_stI	KH13-7	Stn. I	28°50'S	173°31'W	0	23.8756	24.4141	35.4238	0.0563145	N.D.	N.D.		88
	S28_100_stI	KH13-7	Stn. I	28°50'S	173°31'W	100	25.4312	19.4696	35.5408	0.480525	377.215	119.479		89
	S28_1000_stI	KH13-7	Stn. I	28°50'S	173°31'W	1000	27.1378	5.126	34.3311	NA	31178.2	2066.92		90
	S28_OMZ2000_stI	KH13-7	Stn. I	28°50'S	173°31'W	2000	27.6	2.4	34.6	NA	NA	NA		91
	S30_0_st07	KH13-7	Stn. 7	30°00'S	170°00'W	0	23.9665	23.9968	35.4281	0.0384501	7	30		92
	S30_100_st07	KH13-7	Stn. 7	30°00'S	170°00'W	100	25.7426	17.4942	35.4525	0.278049	30	113.178		93
	S30_SCM108_st07	KH13-7	Stn. 7	30°00'S	170°00'W	108	25.7902	17.328	35.462	0.27 (107m)	891.875	167.104		94
	S30_200_st07	KH13-7	Stn. 7	30°00'S	170°00'W	200	26.2225	14.8903	35.2936	0.0148836	7398.51	525.343		95
	S30_400_st07	KH13-7	Stn. 7	30°00'S	170°00'W	400	26.7115	10.1977	34.7356	NA	16938.4	1053.83		96
	S30_1000_st07	KH13-7	Stn. 7	30°00'S	170°00'W	1000	27.1557	4.9029	34.3306	NA	30761.4	1946.56		97
	S30_2000_st07	KH13-7	Stn. 7	30°00'S	170°00'W	2000	27.6494	2.2671	34.6248	NA	37054.4	2402.61		98
	S30_B5472_st07	KH13-7	Stn. 7	30°00'S	170°00'W	5472	27.8027	1.1031	34.7067	NA	33465	2149.2		99
	S30_OMZ2500_st07	KH13-7	Stn. 7	30°00'S	170°00'W	2500	27.6921	1.9996	34.651	NA	NA	NA		100
	S35_0_st08	KH13-7	Stn. 8	35°00'S	170°00'W	0	24.5214	21.6689	35.2779	0.032091	3	78		101
	S35_OMZ2620_st08	KH13-7	Stn. 8	35°00'S	170°00'W	2620	27.6964	1.9777	34.6542	NA	NA	NA		102
	S40_0_st09	KH13-7	Stn. 9	40°00'S	170°00'W	0	24.8699	19.7531	35.0567	0.057823	2	114.019		103
	S40_100_st09	KH13-7	Stn. 9	40°00'S	170°00'W	100	26.3701	13.5611	35.1183	0.348635	3316.94	335.185		104
	S40_1000_st09	KH13-7	Stn. 9	40°00'S	170°00'W	1000	27.0761	5.9854	34.3946	NA	28876.4	1918.69		105
	S40_3000_st09	KH13-7	Stn. 9	40°00'S	170°00'W	3000	27.7677	1.7845	34.7244	NA	33409.2	2260.98		106
	S40_B4665_st09	KH13-7	Stn. 9	40°00'S	170°00'W	4665	27.811	0.9607	34.7051	NA	33777.5	2277.57		107
	S40_OMZ2000_st09	KH13-7	Stn. 9	40°00'S	170°00'W	2000	27.6	2.5	34.6	NA	NA	NA		108
	N1_0	KH11-10	Stn. 2	23°00'N	160°00'E	0	22.7491	26.7809	34.949	0.045	N.D.	3		109
	N2_0	KH11-10	Stn. 5	23°00'N	180°00'W	0	23.1294	26.4483	35.3136	0.052	4	12		110
	N2_100	KH11-10	Stn. 5	23°00'N	180°00'W	100	24.0162	23.654	35.3374	0.177	4	17		111
	N2_1000	KH11-10	Stn. 5	23°00'N	180°00'W	1000	27.3461	3.8486	34.4273	NA	42943.8	2977.56		112
	N2_B-50_5273	KH11-10	Stn. 5	23°00'N	180°00'W	5273	27.7709	1.4503	34.6973	NA	35477.6	2383.35		113
	N3_0	KH11-10	Stn. 8	22°46'N	158°05'W	0	23.7805	24.2692	35.2895	0.123	7	48		114
	S1_0	KH11-10	Stn. 15	23°00'S	120°00'W	0	24.3569	25.3892	36.5016	0.064	3	179.432		115
	S2_0	KH11-10	Stn. 18	30°00'S	107°00'W	0	24.653	21.9843	35.5668	0.022	N.D.	106.429		116
	S2_100	KH11-10	Stn. 18	30°00'S	107°00'W	100	25.4318	18.6962	35.4359	0.056	N.D.	83.9412		117
	S2_1000	KH11-10	Stn. 18	30°00'S	107°00'W	1000	27.2452	4.1014	34.3332	NA	35180.5	2263.53		118
	S2_B-50_3302	KH11-10	Stn. 18	30°00'S	107°00'W	3302	27.7292	1.8345	34.6811	NA	35648.6	2348.35		119
	S3_0	KH11-10	Stn. 21	23°00'S	100°00'W	0	24.1839	24.3441	35.8522	0.023	4	246.951		120
	E1_0	KH12-1	Stn. 1	00°00'N	95°30'W	0	23.7275	23.2139	34.5235	0.166	9663.69	510.882		121
	E2_0	KH12-1	Stn. 5	00°00'N	115°00'W	0	23.4898	24.2489	34.8975	0.205	10124.4	563.608		122
	E2_100	KH12-1	Stn. 5	00°00'N	115°00'W	100	26.1141	14.3867	35.0049	0.114818	19598.5	1049.51		123
	E2_1000	KH12-1	Stn. 5	00°00'N	115°00'W	1000	27.3305	4.9152	34.5528	NA	40973.4	2117.31		124
	E2_B-50_4013	KH12-1	Stn. 5	00°00'N	115°00'W	4013	27.7673	1.4602	34.6937	NA	NA	1744.84		125
	E3_0	KH12-1	Stn. 10	00°00'N	140°00'W	0	23.5866	24.6884	35.0717	0.37	10124.4	442.901		126
	N.D. indicates no data.
	NA indicates no available data
	* nutrient data were from highly sensitive colorimetric system when concentration was less than 100nM
