# Supplementary material for: Basin-scale community assembly of particle-associated and free-living bacteria in the Pacific Ocean
Source: Research Square preprint supplement (doi:10.21203/rs.3.rs-7838572/v1), 2025-11-17
Supplement: Supplementary file 4 [file 1756d90d65bf1167d29ab345.xlsx]

## Sheet: Table A4
	Table A4 Minimum, Median, Average and Maximum of relative abundance (%) of bacterial taxa revealed by 16S rRNA gene of PA (left) and FL (right) in the surface (≤200m) and the deep (≥ 250 m) in the Pacific Ocean
		PA						FL
		Minimum	Median	Average	Maximum	Standard deviation		Minimum	Median	Average	Maximum	Standard deviation
	Surface (≦ 200m)
	Alphaproteobacteria	3.10881	17.6638	18.4314	55.6474	11.0599		21.9079	41.1389	42.0207	67.0097	10.9459
	Deltaproteobacteria	0	3.96583	8.2393	34.9136	8.72305		0	0.779844	4.17077	28.1806	7.061
	Gammaproteobacteria	2.40964	9.02722	9.87967	53.8345	7.04519		1.74695	6.08607	7.96477	30.383	5.77884
	Bacteroidetes	4.90358	22.6078	25.8521	87.2437	14.7527		0.904977	3.59765	7.28927	56.975	10.8799
	Cyanobacteria	0	19.7275	20.1691	73.6626	15.2299		0.0510986	36.9706	31.9385	69.808	21.1918
	Deferribacteres	0	0.580311	1.07889	4.56923	1.19485		0	2.22907	4.01391	20.6464	4.67642
	Planctomycetes	0	4.55805	7.60698	37.9949	8.64227		0	0.0926441	0.181931	1.18906	0.256815
	Verrucomicrobia	0	2.80992	5.49384	35.0655	6.77262		0	0.340136	0.504192	2.34735	0.480219
	Lentisphaerae	0	0.0347222	0.283315	4.67836	0.682237		0	0	0.0194551	0.161063	0.0364375
	Others	0.228311	1.86023	2.96531	11.3849	2.69807		0.102854	1.23319	1.89653	10.1995	1.88466
	Deep (> 200m)
	Alphaproteobacteria	6.00601	22.8454	25.3001	65.522	12.3778		31.4163	41.5944	42.4551	59.214	5.82423
	Deltaproteobacteria	10	21.2254	20.9419	37.5496	5.37205		20.3933	27.3748	27.0036	34.0949	2.87806
	Gammaproteobacteria	3.99212	10.0817	10.5267	24.7629	3.96866		2.72824	7.10458	7.8262	18.4856	3.69282
	Bacteroidetes	0.537634	6.03261	7.41825	31.2639	5.84465		0.220751	0.809553	1.14332	4.29455	0.960932
	Cyanobacteria	0	0.632244	0.987031	4.37637	0.927908		0.0247893	0.203874	0.31805	1.65361	0.317958
	Deferribacteres	0.228519	1.4714	1.68843	7.92079	1.1934		4.52912	12.6095	12.5005	18.9399	3.32177
	Planctomycetes	6.45604	25.9641	26.5222	48.9796	8.62107		0.254842	1.28319	1.72905	5.98785	1.52687
	Verrucomicrobia	0	1.24481	1.54443	8.29268	1.5307		0.179654	0.471815	0.583626	3.07234	0.501613
	Lentisphaerae	0	0.787402	1.50935	23.6416	3.19284		0	0.128406	0.201615	1.79376	0.270128
	Others	0.821918	3.41463	3.56168	6.87984	1.35996		1.66446	5.25958	6.23894	12.7949	3.12879
