# Supplementary material for: Basin-scale community assembly of particle-associated and free-living bacteria in the Pacific Ocean
Source: Research Square preprint supplement (doi:10.21203/rs.3.rs-7838572/v1), 2025-11-17
Supplement: Supplementary file 6 [file d757132f19b1d3d4f377c4aa.xlsx]

## Sheet: Table A3
		Model variables	AIC	ΔAIC	Deviance [%]*
	PA
	1	InvSimp(1/D)~s(lat)+s(log10NN)+s(log10P)+β0	208.1	-	42.4
	2	InvSimp(1/D)~s(lat)+s(log10P)+s(temp)+β0	209.2	1.15	47.1
	3	InvSimp(1/D)~s(lat)+s(log10NN)+s(log10P)+s(chl)+β0	209.4	1.28	43.6
	4	InvSimp(1/D)~s(log10NN)+s(sal)+β0	209.5	1.36	47.9
	5	InvSimp(1/D)~s(lat)+β0	209.5	1.41	34.2
	FL
	1	InvSimp(1/D)~s(lat)+s(log10NN)+s(log10P)+s(sal)+s(temp)+β0	82.4	-	92.7
	2	InvSimp(1/D)~s(lat)+s(log10NN)+s(sal)+s(temp)+β0	85.8	3.44	90.8
	3	InvSimp(1/D)~s(lat)+s(log10NN)+s(log10P)+s(sal)+s(temp)+s(chl)+β0	86.7	4.25	90.8
	4	InvSimp(1/D)~s(lat)+s(log10NN)+s(sal)+s(temp)+s(chl)+β0	87	4.55	89.9
	5	InvSimp(1/D)~s(lat)+s(log10P)+s(sal)+s(temp)+β0	93.9	11.46	87
	*	Deviance = (1 - residual deviance / null deviance) x 100
